# Supplementary material
Source: PubMed Central journal article supplement (PMC7754704)
Supplement: 41577_2020_479_MOESM1_ESM.pdf [file 41577_2020_479_MOESM1_ESM.pdf]

## Supplementary information

---

# A guide to vaccinology: from basic principles to new developments

---

In the format provided by the authors and unedited

Supplementary Table 1 | Selected immunization schedules for diphtheria–tetanus–pertussis (DTP)-containing vaccines\*

| DTP schedules        | 6 weeks | 8 weeks | 10 weeks | 12 weeks | 14 weeks | 16 weeks | 20 weeks | 24 weeks | 9 months | 12 months |
|----------------------|---------|---------|----------|----------|----------|----------|----------|----------|----------|-----------|
| WHO EPI              | x       |         | x        |          | x        |          |          |          |          |           |
| UK                   |         | x       |          | x        |          | x        |          |          |          |           |
| USA/Australia        |         | x       |          |          |          | x        |          | x        |          | x         |
| Scandinavia          |         |         |          | x        |          |          | x        |          |          | x         |
| Optimms <sup>‡</sup> |         | x       |          |          |          | x        |          |          | x        |           |

WHO EPI, World Health Organization Expanded Programme on Immunization.

\*Information obtained from REFS 1–5. <sup>‡</sup>Proposed schedule to be evaluated in clinical trials in Uganda and Nepal.

#### References

1. World Health Organization. *Table 2: Summary of WHO Position Papers - Recommended Routine Immunizations for Children* [https://www.who.int/immunization/policy/Immunization\\_routine\\_table2.pdf](https://www.who.int/immunization/policy/Immunization_routine_table2.pdf) (2020).
2. Public Health England. UK immunisation schedule: the green book, chapter 11. (2014).
3. Centers for Disease Control and Prevention. *Table 1. Recommended Child and Adolescent Immunization Schedule for ages 18 years or younger, United States, 2020* <https://www.cdc.gov/vaccines/schedules/hcp/imz/child-adolescent.html> (2020).
4. Australian Government, D. o. H. *National Immunisation Program Schedule* <https://www.health.gov.au/health-topics/immunisation/immunisation-throughout-life/national-immunisation-program-schedule> (2020).
5. European Centre for Disease Prevention and Control. *Vaccine scheduler* <https://vaccine-schedule.ecdc.europa.eu> (2020).

Supplementary Table 2 | United Kingdom immunization schedule for 1966, 1996 and 2020

**1966**

| Vaccine/Age                    | Visit 1<br>1-6<br>months | Visit 2<br>1-6<br>months       | Visit 3<br>1-6<br>months | Visit 4<br>7-10<br>months | Visit 5<br>7-10<br>months | Visit 6<br>15-18<br>months | Visit 4<br>18-21<br>months | School<br>entry | 8-12<br>years         |
|--------------------------------|--------------------------|--------------------------------|--------------------------|---------------------------|---------------------------|----------------------------|----------------------------|-----------------|-----------------------|
| Diphtheria, Tetanus, Pertussis | DTwP 1                   | DTwP 2                         | DTwP 3                   |                           |                           |                            | DTwP 4                     | DT              | DT                    |
| Polio                          |                          |                                |                          | Polio 1                   | Polio 2                   | Polio 3                    |                            | Polio 4         |                       |
| Smallpox                       |                          | Smallpox 1<br>at 4-5<br>months |                          |                           |                           |                            |                            |                 | Smallpox 2            |
| BCG                            |                          |                                |                          |                           |                           |                            |                            |                 | BCG<br>(>12<br>years) |

**1996**

| Vaccine/Age                                | 2<br>months             | 3<br>months             | 4<br>months             | 12<br>months | 13<br>months | 3-5<br>years      | 13-18<br>years     |
|--------------------------------------------|-------------------------|-------------------------|-------------------------|--------------|--------------|-------------------|--------------------|
| Diphtheria, Tetanus, Pertussis, Polio, Hib | DTwP-Hib<br>+oral polio | DTwP-Hib<br>+oral polio | DTwP-Hib<br>+oral polio |              |              | DT +oral<br>polio | dT + oral<br>polio |
| Measles, Mumps, Rubella                    |                         |                         |                         |              | MMR          | MMR               |                    |

**2020**

| Vaccine/Age                                      | Maternal | 2<br>months          | 3<br>months          | 4<br>months          | 12<br>months | 3-5<br>years | 5-11<br>years | 12-18<br>years | Elderly |
|--------------------------------------------------|----------|----------------------|----------------------|----------------------|--------------|--------------|---------------|----------------|---------|
| Diphtheria, Tetanus, Pertussis, Polio, Hib, HepB | DTaP     | DTaP-IPV<br>HepB-Hib | DTaP-IPV<br>HepB-Hib | DTaP-IPV<br>HepB-Hib | Hib<br>-MenC | dTaP-IPV     |               | dT-IPV         |         |
| Meningococcal ACWY                               |          |                      |                      |                      |              |              |               | MenACWY        |         |
| Rotavirus                                        |          | Rv                   | Rv                   |                      |              |              |               |                |         |
| Measles, Mumps, Rubella                          |          |                      |                      |                      | MMR          | MMR          |               |                |         |
| Pneumococcal                                     |          |                      | PCV13                |                      | PCV13        |              |               |                | PPV     |
| Cervical cancer (HPV)                            |          |                      |                      |                      |              |              |               | HPV x2         |         |
| Meningococcal B                                  |          | MenB                 |                      | MenB                 | MenB         |              |               |                |         |
| Influenza                                        | TIV      |                      |                      |                      |              | LAIV         | LAIV          |                | TIV     |
| Shingles                                         |          |                      |                      |                      |              |              |               |                | VZV     |

DTwP, diphtheria, tetanus and whole-cell pertussis; BCG, Bacillus Calmette-Guérin; Hib, *Haemophilus influenzae* type B; MMR, measles, mumps and rubella; DTaP, diphtheria, tetanus and acellular pertussis; IPV, inactivated polio vaccine; HepB, hepatitis B virus; MenC, capsular group C meningococcus; Rv, rotavirus; PCV13, 13-valent pneumococcal conjugate vaccine; PPV, pneumococcal polysaccharide vaccine; HPV, human papilloma virus; MenB, group B meningococcus; TIV trivalent (inactivated) influenza vaccine; LAIV, Live attenuated influenza vaccine; VZV, varicella zoster virus.
